# Supplementary material for: A water-stable luminescent Zn-MOF based on a conjugated π-electron ligand as an efficient sensor for atorvastatin and its application in pharmaceutical samples
Source: Royal Society of Chemistry journal article supplement (doi:10.1039/d2tc00291d), 2022-01-01
Supplement: d2tc00291d1.pdf [file d2tc00291d1.pdf]

## A Water-Stable Luminescent Zn-MOF Based on a Conjugated $\pi$ -electron Ligand as an Efficient Sensor for Atorvastatin and Its Application in Pharmaceutical Samples

Luis D. Rosales-Vázquez,<sup>a</sup> Josue Valdes-García,<sup>a</sup> J. M. Germán-Acacio,<sup>b</sup> José C. Páez-Franco,<sup>b</sup> Diego Martínez-Otero,<sup>c</sup> Alfredo R. Vilchis-Néstor, Joaquín Barroso-Flores,<sup>c</sup> Víctor Sánchez-Mendieta<sup>c</sup> and Alejandro Dorazco-González<sup>a\*</sup>

<sup>a</sup>Instituto de Química, Universidad Nacional Autónoma de México. Circuito Exterior, Ciudad Universitaria, Ciudad de México, 04510, México. E-mail: [adg@unam.mx](mailto:adg@unam.mx)

<sup>b</sup>Red de Apoyo a la Investigación, Instituto Nacional de Ciencias Médicas y Nutrición SZ-Universidad Nacional Autónoma de México (CIC-UNAM)

<sup>c</sup>Centro Conjunto de Investigación en Química Sustentable UAEM-UNAM, Carretera Toluca-Ixtlahuaca Km. 14.5, San Cayetano, Toluca, Estado de México, 50200, México. E-mail: [vsanchezm@uaemex.mx](mailto:vsanchezm@uaemex.mx)

### Electronic Supplementary Information

**Table S1.** Crystal data and structural refinement parameters for **1**.

**Table S2.** Selected bond distances (Å) and angles (°) for **1**.

**Table S3.** Recent electrochemical nanosensors for detection and quantification of ATV in aqueous media.

**Fig. S1.** Schematic trinuclear SBU of **1**.

**Fig. S2.** Simplified topology network of **1**.

**Fig. S3.** Space-filling views of **1**, showing the two types of main pores; a) view along *c* axis. b) view along *a* axis. c) view along *b* axis. d) view along a plane perpendicular to *ac* plane.

**Fig. S4.** Depiction of void surfaces for a packing section of **1**; view along *a*-axis.

**Fig. S5.** IR spectra of Zn LMOF **1** before and after storage in ethanol-water for 24 hours.

**Fig. S6.** TGA curve and DSC of **1**.

**Fig. S7.** <sup>13</sup>C CPMAS NMR (spinning rate at 8 kHz) spectrum for **1** and the asymmetric unit from the crystal structure (above).

**Fig. S8.** Rotational disorder of central phenyl in the crystal of **1**.

**Fig. S9.** PXRD patterns of **1** and its solvent-free form.

**Fig. S10.** TGA curves of **1** and its solvent-free form.

**Fig. S11.** Solid-state emission spectra of free H<sub>4</sub>tptc ligand and **1**. CIE-1931 chromaticity diagram of **1** and free H<sub>4</sub>tptc ligand.

**Fig. S12.** Emission spectra of **1** dispersed in ethanol-water at pH= 7.0 upon additions of increasing amounts of FLV sodium and Stern-Volmer plot at 440 nm.

**Fig. S13.** Photoluminescence spectra of **1** after four cycles of ATV detecting-removal in ethanol-water at pH= 7.0.

**Fig. S14.** PXRD pattern of **1** after four cycles of ATV detecting-removal.

**Fig. S15.** Emission spectra of **1** dispersed in ethanol-water (8/2, v/v) at pH= 7.0 upon additions of ATV from real pharmaceutical samples (Eturion 20).

**Fig. S16.** HPLC chromatogram of pure standard of atorvastatin calcium and calibration curve.

**Fig. S17.** PXRD pattern of as-synthesized Zn-LMOF **1** and Zn-LMOF **1** treated with ATV calcium for 24 h.

**Fig. S18.** IR spectra of as-synthesized Zn-LMOF **1** and Zn-LMOF **1** treated with ATV calcium for 24 h.

**Fig. S19.** SEM micrographs collected at different magnifications of A) as-synthesized Zn-LMOF **1** and b) Zn-LMOF **1** treated with ATV calcium.

**Fig. S20.** A selected representative section of the Zn-MOF **1** to calculate interaction with ATV.

## General considerations

### Materials and methods

All chemicals are commercially available ([1,1':4',1'']Terphenyl- 3,3'',5,5''-tetracarboxylic acid 95%;  $\text{Zn}(\text{CF}_3\text{SO}_3)_2$  98%; atorvastatin calcium trihydrate 98%; rosuvastatin calcium 98%; pravastatin sodium salt hydrate 98%; fluvastatin sodium hydrate 98%; *N,N*-dimethylformamide 99% and ethanol anhydrous 98% from Sigma-Aldrich (St. Louis, Missouri, United States)) were used as received.

The FT-IR spectrum was recorded in the range of 4000–600  $\text{cm}^{-1}$  by using the standard Pike ATR cell on a Bruker Tensor 27 FT-IR spectrophotometer (Bruker Optik GmbH, Ettlingen, Germany). Elemental analysis for C, H, and N were carried out by standard methods using a Vario Micro-Cube analyzer.

Powder X-ray diffraction (PXRD) was conducted using a Bruker D8 ADVANCE X-ray powder diffractometer ( $\text{Cu-K}\alpha$ ,  $\lambda = 1.5418 \text{ \AA}$ ) (Bruker AXS GmbH, Karlsruhe, Germany) with the  $2\theta$  range of 5–50°.

Thermogravimetric analyses were performed using TA Instruments equipment, under a dinitrogen atmosphere, at a heating rate of 10  $^\circ\text{C min}^{-1}$ , and from 25 to 450  $^\circ\text{C}$ .

Scanning electron microscopy (SEM) analysis were carried out using a JSM-6510LV microscope from JEOL (JEOL, Ltd, Akishima, Tokyo, Japan) equipped with a Bruker QUANTAX 200 energy-dispersive X-ray spectrometer (EDS) (Bruker Nano GmbH, Adlershof, Berlin, Germany) for elemental characterization. The crystals were dried at room-temperature conditions and fixed on Al stubs with carbon double tape and finally coated with a thin layer of gold using a Denton IV sputtering chamber before SEM imaging acquisition.

$^{13}\text{C}$  CPMAS NMR experiment was recorded with a Bruker Avance II 300 spectrometer (operating at:  $^1\text{H}$  300 MHz and  $^{13}\text{C}$  75 MHz). *ss* NMR measurement was carried out on a 4 mm rotor double resonance and recorded with a contact time of 3 ms and a delay of 10 s at 8 kHz spinning rate at ambient temperature.

Liquid chromatographic determination of atorvastatin: From the extracted tablet stock solution, a dilution 1/400 was performed in ethanol, and an aliquot of 40  $\mu\text{L}$  was injected into an HPLC 1260 Infinity II (Agilent) coupled to a diode array detector. The UV detection was set to 220 nm. The mobile phase was 0.01 mol/L sodium dihydrogen phosphate pH 5.5 in distilled water and 40% ethanol (Sigma-HPLC grade) with a constant rate flow of 2  $\text{ml min}^{-1}$ . The analysis was performed on a column Zorbax Eclipse XDB-C18 (Agilent) equilibrated at 37  $^\circ\text{C}$ . To calculate the final concentration of the sample extracted, a linear analytical curve (0–88  $\mu\text{M mL}^{-1}$ ) was prepared with pure atorvastatin (PHR1422-Sigma). The corresponding peak for atorvastatin is 2.55 min.

**Table S1.** Crystal data and structural refinement parameters for Zn-MOF, **1**.

|                                                  |                                                                          |
|--------------------------------------------------|--------------------------------------------------------------------------|
| Empirical formula                                | C <sub>50.21</sub> H <sub>43.23</sub> O <sub>20.41</sub> Zn <sub>3</sub> |
| Formula weight                                   | 1002.72                                                                  |
| Temperature (K)                                  | 100(2)                                                                   |
| Wavelength (Å)                                   | 1.54178                                                                  |
| Crystal system                                   | Monoclinic                                                               |
| Space group                                      | C2/c                                                                     |
| <i>a</i> (Å)                                     | 10.1439(6)                                                               |
| <i>b</i> (Å)                                     | 28.6171(15)                                                              |
| <i>c</i> (Å)                                     | 18.2650(10)                                                              |
| $\alpha$ (°)                                     | 90                                                                       |
| $\beta$ (°)                                      | 90.938(3)                                                                |
| $\gamma$ (°)                                     | 90                                                                       |
| Volume (Å <sup>3</sup> )                         | 5301.4(5)                                                                |
| Z                                                | 4                                                                        |
| D <sub>calc</sub> (Mg/m <sup>3</sup> )           | 1.256                                                                    |
| Absorption coefficient (mm <sup>-1</sup> )       | 2.090                                                                    |
| F(000)                                           | 2016                                                                     |
| Crystal size (mm <sup>3</sup> )                  | 0.172 x 0.098 x 0.059                                                    |
| Theta range for data collection (°)              | 3.088 to 69.123                                                          |
| Index ranges                                     | -12 ≤ <i>h</i> ≤ 12, 0 ≤ <i>k</i> ≤ 34, 0 ≤ <i>l</i> ≤ 22                |
| Reflections collected                            | 4849                                                                     |
| Independent reflections                          | 4849 [R(int) = 0.0225]                                                   |
| Refinement method                                | Full-matrix least-squares on F <sup>2</sup>                              |
| Data/restraints/parameters                       | 4849 / 398 / 346                                                         |
| Goodness-of-fit on F <sup>2</sup>                | 1.120                                                                    |
| Final R indices [I > 2σ(I)]                      | R1 = 0.0749, wR2 = 0.2167                                                |
| R indices (all data)                             | R1 = 0.0815, wR2 = 0.2230                                                |
| Largest diff. peak and hole (e.Å <sup>-3</sup> ) | 0.830 and -0.951                                                         |

**Table S2.** Selected bond distances (Å) and angles (°) for **1**.

| Bond lengths (Å) |          |              |          |
|------------------|----------|--------------|----------|
| Zn(1)-O(1)       | 2.012(4) | Zn(2)-O(7)   | 2.000(5) |
| Zn(1)-O(1)#1     | 2.012(4) | Zn(2)-O(2)#6 | 2.008(4) |
| Zn(1)-O(6)#2     | 2.085(4) | Zn(2)-O(5)#7 | 2.013(4) |
| Zn(1)-O(6)#3     | 2.085(4) | Zn(2)-O(4)#8 | 2.038(4) |
| Zn(1)-O(4)#4     | 2.171(4) | Zn(2)-O(8)   | 2.425(6) |
| Zn(1)-O(4)#5     | 2.171(4) | Zn(2)-O(7)   | 2.000(5) |

  

| Angles (°)          |           |                     |            |
|---------------------|-----------|---------------------|------------|
| O(1)-Zn(1)-O(1)#1   | 180.0     | O(6)#2-Zn(1)-O(4)#5 | 91.40(16)  |
| O(1)-Zn(1)-O(6)#2   | 95.51(17) | O(6)#3-Zn(1)-O(4)#5 | 88.60(16)  |
| O(1)#1-Zn(1)-O(6)#2 | 84.49(17) | O(4)#4-Zn(1)-O(4)#5 | 180.0(2)   |
| O(1)-Zn(1)-O(6)#3   | 84.49(17) | O(7)-Zn(2)-O(2)#6   | 105.40(19) |
| O(1)#1-Zn(1)-O(6)#3 | 95.51(17) | O(7)-Zn(2)-O(5)#7   | 97.75(19)  |
| O(6)#2-Zn(1)-O(6)#3 | 180.0(2)  | O(2)#6-Zn(2)-O(5)#7 | 102.20(19) |
| O(1)-Zn(1)-O(4)#4   | 88.60(16) | O(7)-Zn(2)-O(4)#8   | 132.85(19) |
| O(1)#1-Zn(1)-O(4)#4 | 91.40(16) | O(2)#6-Zn(2)-O(4)#8 | 107.50(16) |
| O(6)#2-Zn(1)-O(4)#4 | 88.60(16) | O(5)#7-Zn(2)-O(4)#8 | 107.11(17) |
| O(6)#3-Zn(1)-O(4)#4 | 91.40(16) | O(7)-Zn(2)-O(8)     | 57.71(19)  |
| O(1)-Zn(1)-O(4)#5   | 91.40(16) | O(2)#6-Zn(2)-O(8)   | 91.9(2)    |
| O(1)#1-Zn(1)-O(4)#5 | 88.60(16) | O(5)#7-Zn(2)-O(8)   | 154.54(18) |
|                     |           | O(4)#8-Zn(2)-O(8)   | 88.29(2)   |

Symmetry transformations used to generate equivalent atoms:

#1 -x+1,-y+1,-z #2 x-1/2,-y+1/2,z-1/2 #3 -x+3/2,y+1/2,-z+1/2  
 #4 -x+1,y,-z+1/2 #5 x,-y+1,z-1/2 #6 x-1/2,-y+1/2,z+1/2  
 #7 x-1,y,z #8 x-1/2,y-1/2,z .

**Table S3.** The comparison of the proposed sensor with other reported sensors for ATV determination with application in real samples.

| Material                                                        | Detection technique | LOD (M)              | Real Sample          | Ref       |
|-----------------------------------------------------------------|---------------------|----------------------|----------------------|-----------|
| AuNP-CNT/SPCE <sup>[a]</sup>                                    | Electrochemistry    | $1.9 \times 10^{-7}$ | Tablet               | [1]       |
| Fe <sub>3</sub> O <sub>4</sub> @PPY / MWCNTs/ GE <sup>[b]</sup> | Electrochemistry    | $2.3 \times 10^{-8}$ | Tablet / human serum | [2]       |
| EPPGE <sup>[c]</sup>                                            | Electrochemistry    | $2.1 \times 10^{-5}$ | Tablet               | [3]       |
| PPY/CNTs/GCE <sup>[d]</sup>                                     | Electrochemistry    | $1.5 \times 10^{-9}$ | Tablet               | [4]       |
| ZnO/NS/ CPE <sup>[e]</sup>                                      | Electrochemistry    | $2.5 \times 10^{-9}$ | Tablet / urine       | [5]       |
| VACNT-GO <sup>[f]</sup>                                         | Electrochemistry    | $9.4 \times 10^{-9}$ | Urine / human serum  | [6]       |
| CPE in micelles <sup>[g]</sup>                                  | Electrochemistry    | $4.0 \times 10^{-9}$ | Tablet / urine       | [7]       |
| boron-doped diamond electrode                                   | Electrochemistry    | $2.7 \times 10^{-7}$ | Tablet / urine       | [8]       |
| Ce(IV)-benzothiazolinone hydrazine complex                      | Spectrophotometry   | $8.2 \times 10^{-6}$ | Tablet               | [9]       |
| Zn-LMOF                                                         | Fluorescence        | $4.2 \times 10^{-6}$ | Tablet               | This work |

<sup>[a]</sup>AuNP-CNT/SPCE = gold nanoparticles-carbon nanotubes/screen-printed carbon based electrode

<sup>[b]</sup>Fe<sub>3</sub>O<sub>4</sub>@PPY / MWCNTs/ GE= graphite electrode modified with polypyrrole-coated Fe<sub>3</sub>O<sub>4</sub> nanohybrid by core-shell structure (Fe<sub>3</sub>O<sub>4</sub>@PPyNPs) and multiwall carbon nanotubes (MWCNTs)

<sup>[c]</sup>EPPGE = edge-plane pyrolytic graphite electrode

<sup>[d]</sup>PPY /CNTs / GCE = polypyrrole/carbon nanotube/glassy carbon electrode

<sup>[e]</sup>ZnO/NS/ CPE = zinc oxide nanoparticles and nano-silica carbon paste electrode

<sup>[f]</sup>VACNT-GO electrode = vertically aligned carbon nanotube/graphene oxide

<sup>[g]</sup>CPE = carbon paste electrode

- 1 R. O. Gunache, A. V. Bounegru and C. Apetrei, *Inventions*, 2021, **6**, 57.
- 2 A. Tavousi, E. Ahmadi, L. Mohammadi-Behzad, V. Riahifar and F. Maghemi, *Microchem. J.*, 2020, **158**, 105159.
- 3 O. Fazlolahzadeh, A. Rouhollahi and M. Hadi, *Anal. Bioanal. Electrochem.*, 2016, **8**, 566–577.
- 4 Z. Kamalzadeh and S. Shahrokhian, *Bioelectrochemistry*, 2014, **98**, 1–10.
- 5 S. D. Bukkitgar, N. P. Shetti and R. M. Kulkarni, *Sensors Actuators, B Chem.*, 2018, **255**, 1462–1470.
- 6 T. A. Silva, H. Zanin, F. C. Vicentini, E. J. Corat and O. Fatibello-Filho, *Analyst*, 2014, **139**, 2832–2841.
- 7 J. C. Abbar and S. T. Nandibewoor, *Colloids Surfaces B Biointerfaces*, 2013, **106**, 158–164.
- 8 B. Dogan-Topal, B. Uslu and A. S. Ozkan, *Comb. Chem. High Throughput Screen.*, 2007, **10**, 571–582.
- 9 S. Ashour, M. Bahbouh and M. Khateeb, *Spectrochim. Acta - Part A Mol. Biomol. Spectrosc.*, 2011, **78**, 913–917.

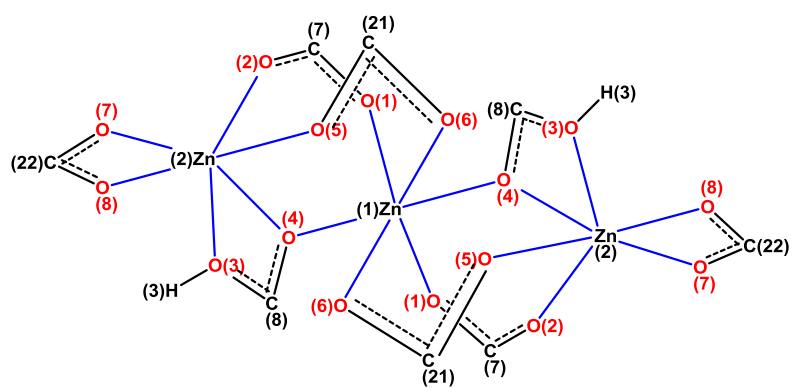

A

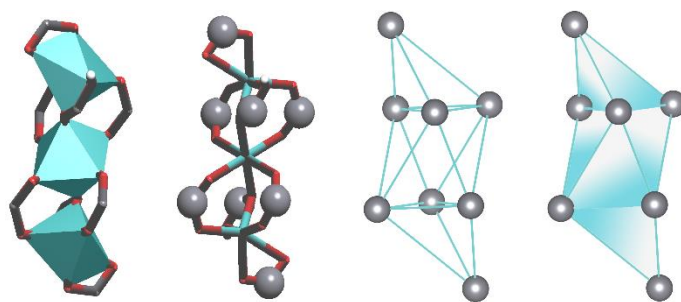

B

**Fig. S1.** A) Coordination mode of trinuclear SBUs of **1** and B) Schematic illustrations of the trinuclear core.

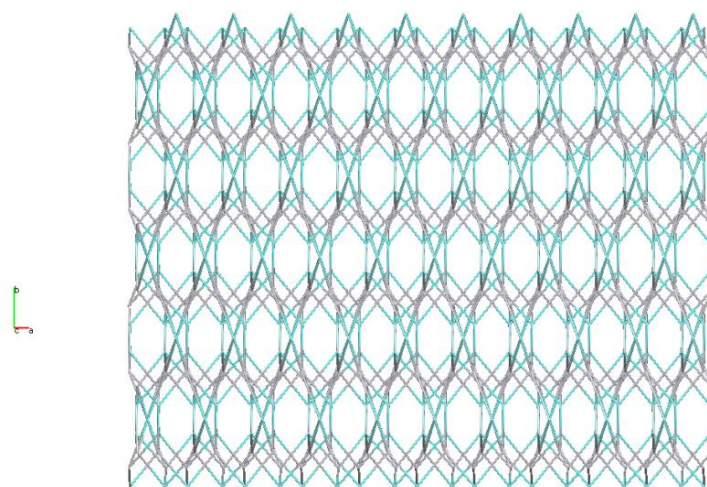

**Fig. S2.** Simplified topology network of **1**.

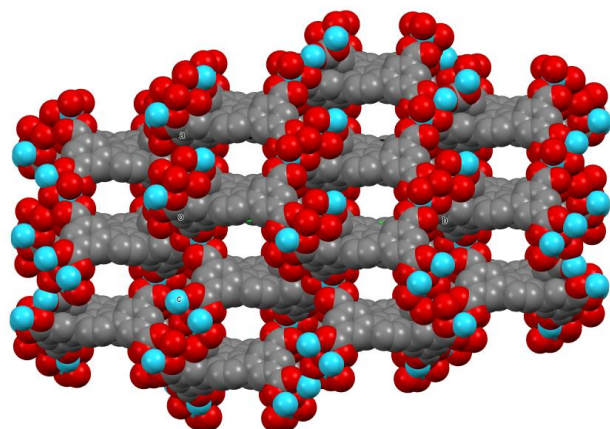

**Fig. S3.** Space-filling views of **1**, showing pores, view along a plane perpendicular to *ac* plane (hydrogen atoms and lattice molecules are omitted for clarity). Atom codes: Zn (blue), C (grey), O (red) and H (white).

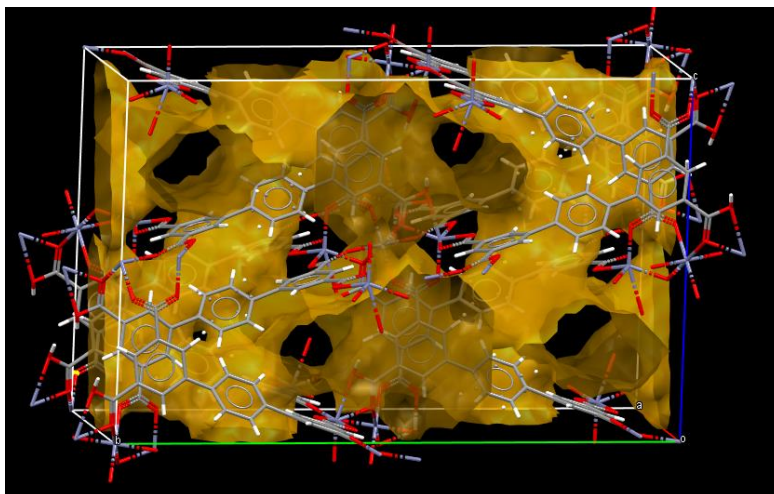

**Fig. S4.** Void surfaces for a packing section of **1**; view along *a* axis. Zn (blue), C (grey), O (red) and H (white).

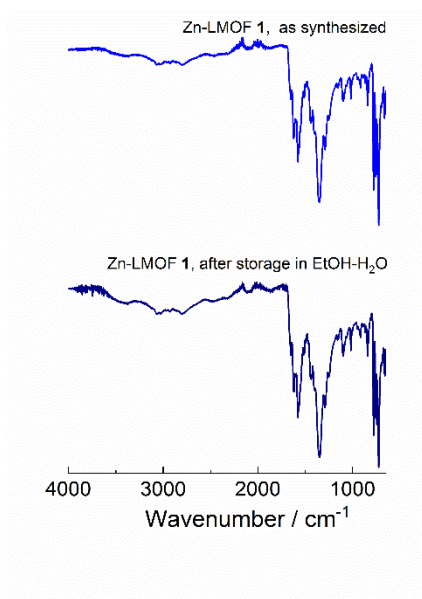

**Fig. S5.** IR spectra of Zn LMOF 1 before and after storage in ethanol-water for 24 hours.

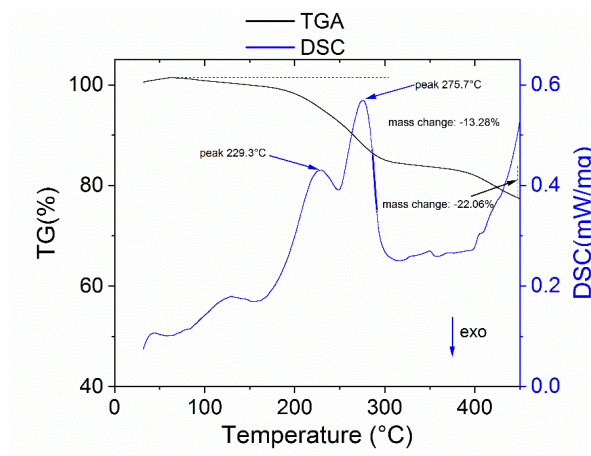

**Fig. S6.** TGA curve and DSC of Zn-LMOF 1.



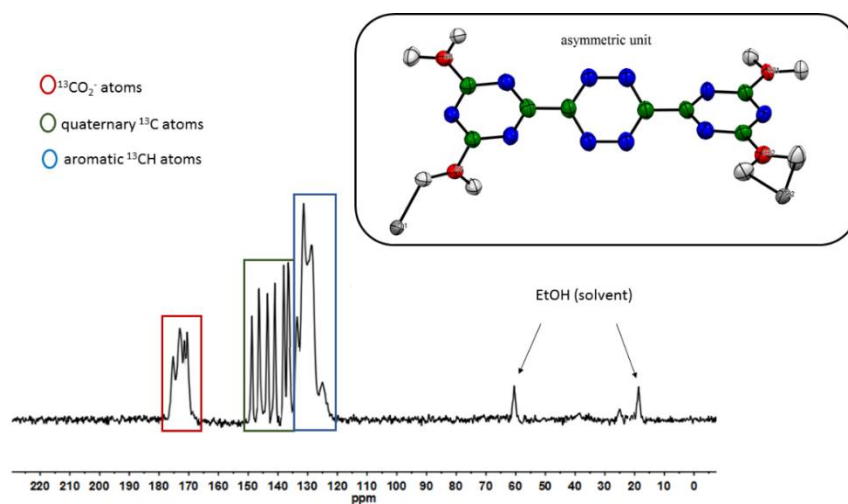

**Fig. S7.**  $^{13}\text{C}$  ss-CPMAS NMR (spinning rate at 8 kHz) spectrum for **1** and the asymmetric unit from the crystal structure (above).

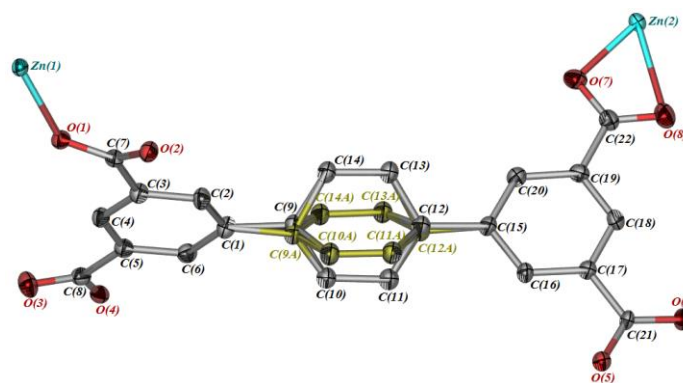

**Fig. S8.** Rotational disorder of central phenyl in the crystal of **1**.

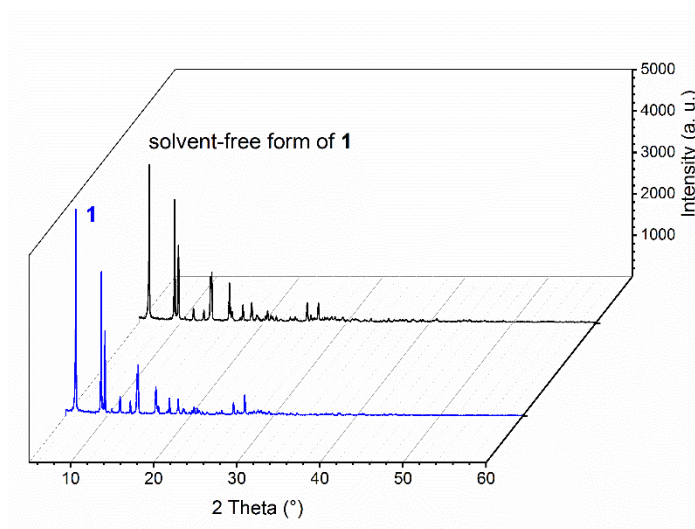

**Fig. S9.** PXRD patterns of **1** and its solvent-free form.

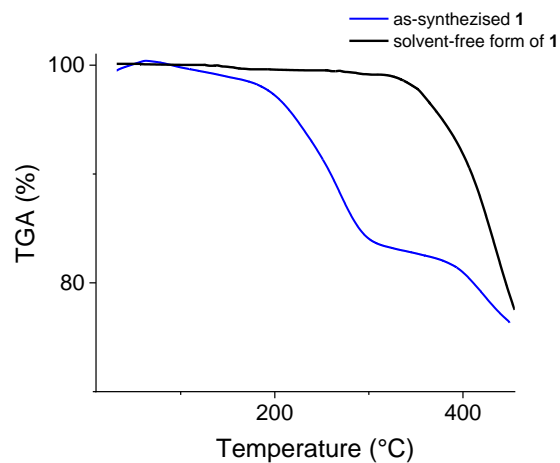

**Fig. S10.** TGA curves of **1** and its solvent-free form.

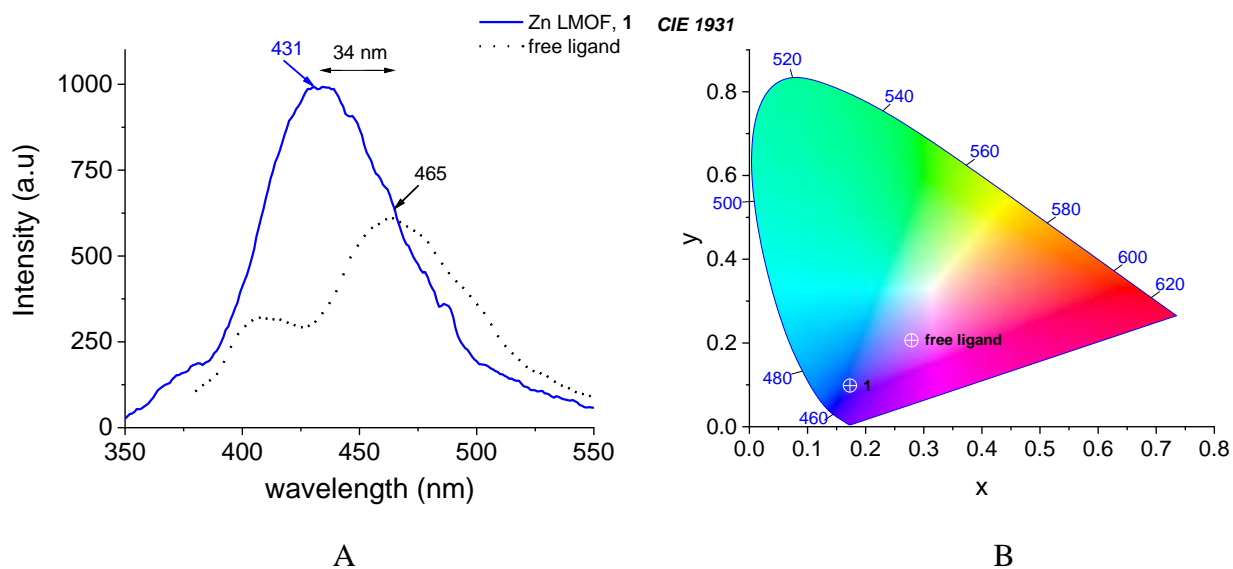

**Fig. S11.** A) Solid-state emission spectra of Zn- MOF **1** (solid line) and free H<sub>4</sub>tpc ligand (dot line). B) CIE-1931 chromaticity diagram of **1** and free H<sub>4</sub>tpc ligand.

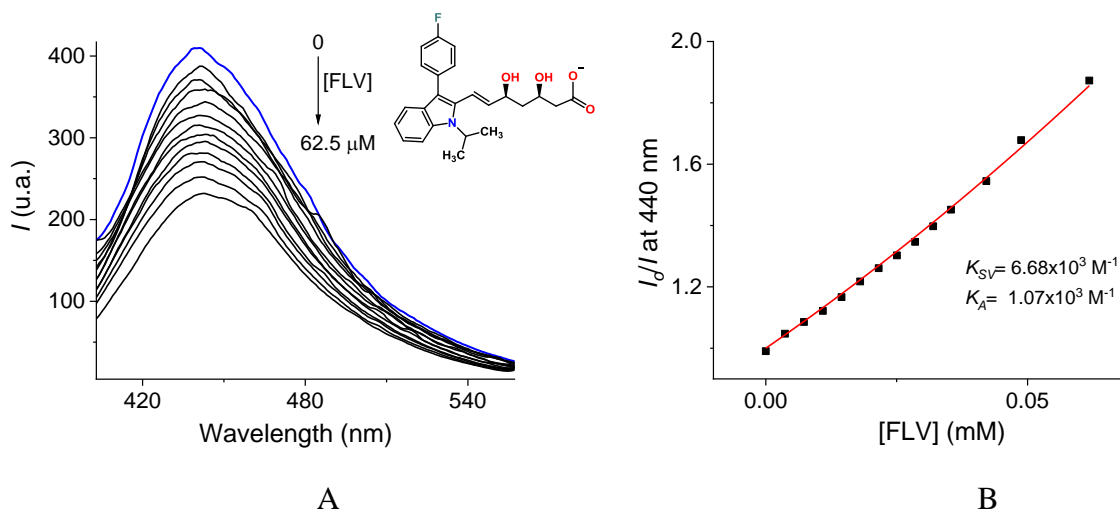

**Fig. S12.** A) Emission spectra ( $\lambda_{\text{ex}} = 330 \text{ nm}$ ) of **1** dispersed in ethanol-water (8/2, v/v) at pH= 7.0 upon additions of increasing amounts of FLV sodium. B) Stern-Volmer plot at 440 nm, the solid line was obtained by fitting to Eq. (2).

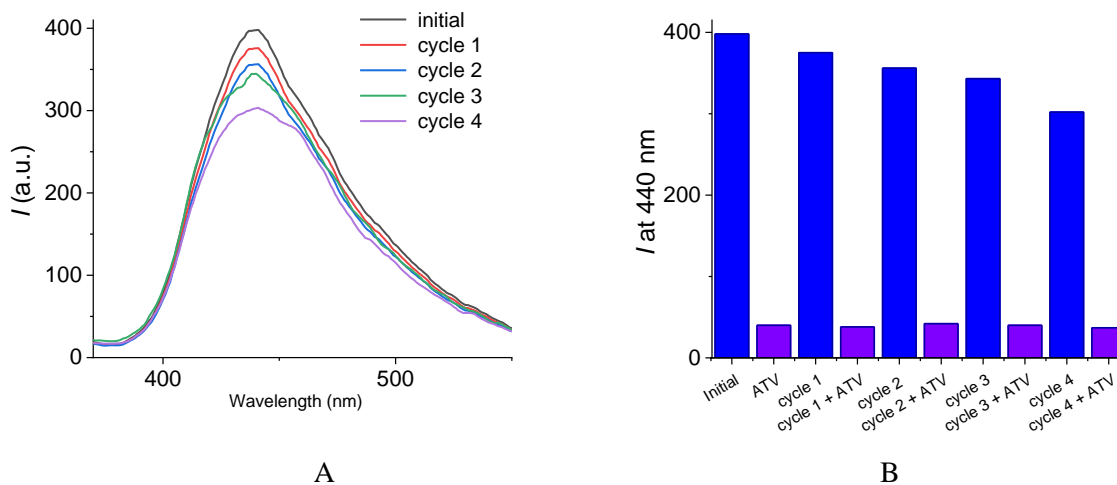

**Fig. S13.** A) Photoluminescence spectra of **1** after four cycles of ATV detecting-removal in ethanol-water at pH= 7.0. B) Quenching efficiencies of **1** in four cycles of ATV detection, in which **1** was treated with ethanol-DMF for the next cycles of detection.

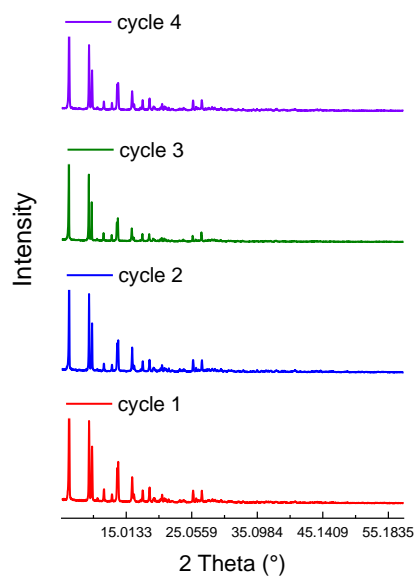

**Fig. S14.** PXRD pattern of **1** after four cycles of ATV detecting-removal.

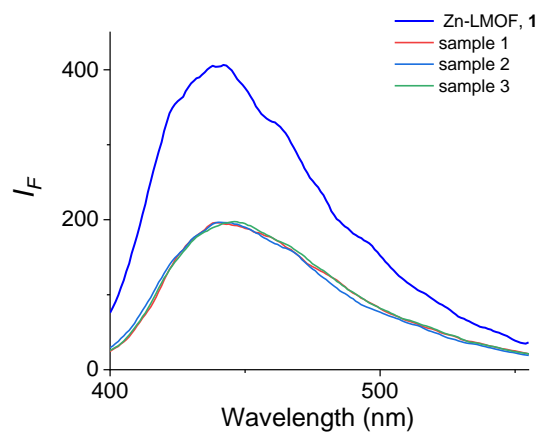

**Fig. S15.** Emission spectra ( $\lambda_{\text{ex}}= 330$  nm) of **1** dispersed in ethanol-water (8/2, v/v) at pH= 7.0 upon additions of ATV from real pharmaceutical samples (Eturium 20). The test was carried out in triplicate.

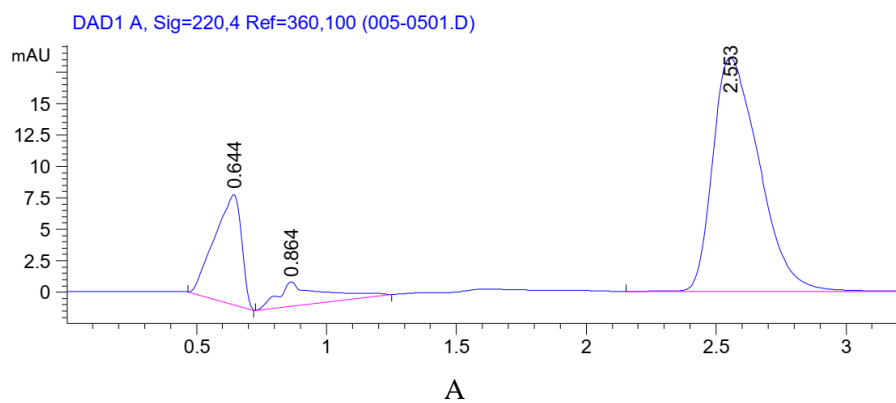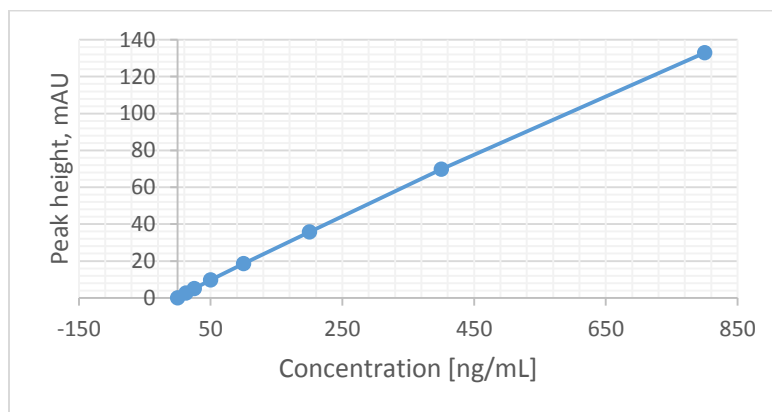

**Fig. S16.** A) HPLC chromatogram of pure standard of atorvastatin calcium [100 ng/mL]. B) Calibration curve showing the peak height (mAU) as a function of atorvastatin calcium concentration [ng/mL]. The corresponding peak for atorvastatin is 2.55 min.

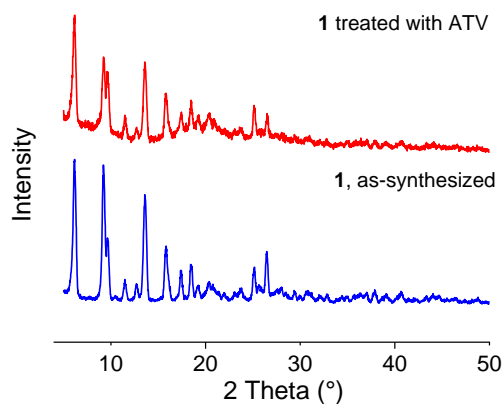

**Fig. S17.** PXRD pattern of as-synthesized **1** and **1** treated with ATV calcium for 24 h.

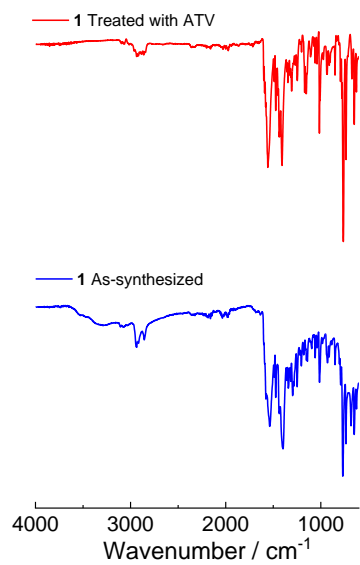

**Fig. S18.** IR spectra of as-synthesized **1** and **1** treated with ATV calcium for 24 h.

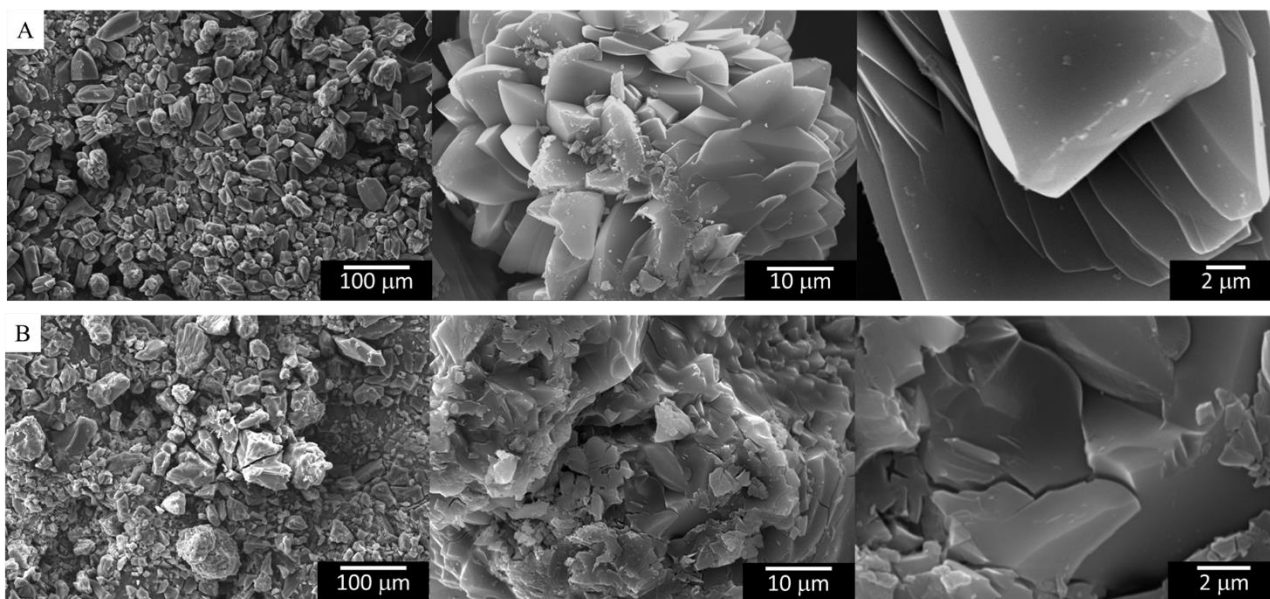

**Fig. S19.** SEM micrographs collected at different magnifications of A) as-synthesized **1** and b) **1** treated with ATV calcium.

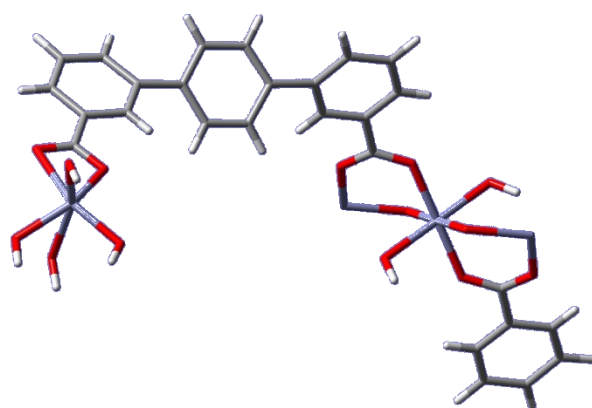

**Fig. S20.** A selected representative section of **1** to calculate interaction with ATV.
